# Supplementary material for: The Key Role of Fatty Acid Synthase in Lipid Metabolism and Metamorphic Development in a Destructive Insect Pest, Spodoptera litura (Lepidoptera: Noctuidae)
Source: MDPI journal article supplement (doi:10.3390/ijms23169064), 2022-08-13
Supplement: s1 [file s1]

**Table S1** Primers used for qRT-PCR of lipogenesis-related genes in *Spodoptera litura*

| Gene name                       | Primer sequence (5'-3')   | Product size(bp) |
|---------------------------------|---------------------------|------------------|
| <i>Fatty acid synthase 1 F</i>  | GTGTGGTTTCGTGTTCTCC       | 149              |
| <i>Fatty acid synthase 1 R</i>  | GCCTCCGTGATGATGTTG        |                  |
| <i>Fatty acid synthase 2 F</i>  | TCCTCTACGCTCTCCTAAC       |                  |
| <i>Fatty acid synthase 2 R</i>  | ACGATGTCCACGGTATGA        |                  |
| <i>Desaturase F</i>             | ATGTCTTTGTGGGATAGG        | 139              |
| <i>Desaturase R</i>             | CGATAAGGTCAGGGTTTG        |                  |
| <i>acetyl-CoA carboxylase F</i> | CGCCTTCCAGAACAATGACAT     | 165              |
| <i>acetyl-CoA carboxylase R</i> | TCTAACGCACTCTTGAACCTCT    |                  |
| <i>Lipase F</i>                 | TAAGGAGATAGAGCCAGAGTTCTT  | 137              |
| <i>Lipase R</i>                 | TCTTCATCATTCGCTAGTCATAGTC |                  |
| <i>EF1 F</i>                    | GAAACCGCTAAATACTATGTCA    | 161              |
| <i>EF1 R</i>                    | CGGGTCTGTCCGTTCTTC        |                  |
| <i>GAPDH F</i>                  | CTGCTAAAGCCGTAGGAAA       | 113              |
| <i>GAPDH R</i>                  | CTGCTAAAGCCGTAGGAAA       |                  |

**Table S2** Oligonucleotide templates used to synthesize siRNA

| Gene Name                             | Primer sequence (5'-3')                         |
|---------------------------------------|-------------------------------------------------|
| <i>Oligo- 1 Fatty acid synthase 1</i> | GATCACTAATACGACTCACTATAGGGCCAATACTACGGCAACAATTT |
| <i>Oligo-2 Fatty acid synthase 1</i>  | AAATTGTTGCCGTAGTCTTGCCCTATAGTGAGTCGTATTAGTGATC  |
| <i>Oligo-3 Fatty acid synthase 1</i>  | AACCAATACTACGGCAACAATCCCTATAGTGAGTCGTATTAGTGATC |
| <i>Oligo-4 Fatty acid synthase 1</i>  | GATCACTAATACGACTCACTATAGGGATTGTTGCCGTAGTCTTGGTT |
| <i>Oligo- 1 Fatty acid synthase 2</i> | GATCACTAATACGACTCACTATAGGGGCATTGAACCTGATTACATTT |
| <i>Oligo- 2 Fatty acid synthase 2</i> | AAATGTAATCAGGTTCAATGCCCTATAGTGAGTCGTATTAGTGATC  |
| <i>Oligo- 3 Fatty acid synthase 2</i> | AAGCATTGAACCTGATTACATCCCTATAGTGAGTCGTATTAGTGATC |
| <i>Oligo- 4 Fatty acid synthase 2</i> | GATCACTAATACGACTCACTATAGGGATGTAATCAGGTTCAATGCTT |
| <i>Oligo-1GFP</i>                     | GATCACTAATACGACTCACTATAGGGGGGATGTCTCACATCTTGTTT |
| <i>Oligo-2GFP</i>                     | AAACAAGATGTGAGACATCCCCCTATAGTGAGTCGTATTAGTGATC  |
| <i>Oligo-3GFP</i>                     | AAGGGATGTCTCACATCTTGTCCTATAGTGAGTCGTATTAGTGATC  |
| <i>Oligo-4GFP</i>                     | GATCACTAATACGACTCACTATAGGGACAAGATGTGAGACATCCCTT |
